# Supplementary material for: Modelling BioNano optical data and simulation study of genome map assembly
Source: Oxford University Press journal article supplement (doi:10.1093/bioinformatics/bty456), 2018-06-07
Supplement: bioinformatics_34_23_3966_s2.xlsx [file bioinformatics_34_23_3966_s2.xlsx]

## Sheet: Supplementary Table S1
Supplementary Table S1. BioNano molecule data generated from eight organisms
Type of data	O. sitiva	D. melanogaster	S. pombe	S. coelicolor	P. putida	E.coli PL	E.coli A9	E.coli A7
Genome Size (Mb)	380	140	12.6	8.7	6.2	4.6	4.6	4.6
Quantity	71.4G	12.5G	27.3G	3.9G	10.7G	1.4G	213.6M	176.0M
(Coverage depth)	(~178X)	（~86X）	(~2184X)	(~448X)	(~1783X)	(~304X)	(~46X)	(~38X)
No. of chips	2	1	1	1	1	1	1	1
No. of flowcells	3	1	1	1	1	1	1	1
No. of runs	10	2	1	2	2	1	1	1
No. of scans	132	34	30	4	4	7	3	3
Raw Molecules N50	101.6	103.1	138	120.8	127.3	234	166.4	132.4
Filtered Molecule N50 (Kb;Size >= 100 Kb)	136.4	133.4	172.1	171.8	169.8	246.4	184.6	175.2
No. of molecules	517107	89362	161696	23073	64073	6369	1186	1034
Avg. label SNR	25.1	12.7	9.4	14.9	13.5	20.6	26.4	21.8
Avg. label Intensity	0.1	0.15	0.06	0.1	0.11	0.03	0.1	0.11
Avg. label Density (/100 Kb)	9.8	10	11.4	12.3	11.5	10.9	11	10.9
FP rate (%)*	5.76	9.04	4.02	3.23	2.2	7.01	3.98	6.35
FN rate (%)*	13.47	15.6	15.9	12.01	14	12.05	5.25	9.07
*FN and FP rates may vary on conditions of nicking and labeling reactions, which are optimized by the manufacture (BioNano Genomics).
