# Supplementary material for: Modelling BioNano optical data and simulation study of genome map assembly
Source: Oxford University Press journal article supplement (doi:10.1093/bioinformatics/bty456), 2018-06-07
Supplement: bioinformatics_34_23_3966_s3.xlsx [file bioinformatics_34_23_3966_s3.xlsx]

## Sheet: Supplementary Table S2
Supplementary Table S2. Count of potential fragile sites of the six organisms in our study.
	< 400 bpa	< 250 bpb	< 100 bpc
O.sitiva	1309	816	326
D.melanogaster	544	357	148
S.pombe	78	49	25
S.coelicolor	38	30	8
P.putida	19	17	10
E.coli	7	3	2
a. distance of neighboring sites <400bp.
b. distance of neighboring sites <250bp.
c. distance of neighboring sites <100bp.
