# Supplementary material for: Modelling BioNano optical data and simulation study of genome map assembly
Source: Oxford University Press journal article supplement (doi:10.1093/bioinformatics/bty456), 2018-06-07
Supplement: bioinformatics_34_23_3966_s4.xlsx [file bioinformatics_34_23_3966_s4.xlsx]

## Sheet: Supplementary Table S3
Supplementary Table S3. Simulation of BioNano molecule data for four organisms and comparison with corresponding experimental datasets
	No. of molecules	Quantity (Gb)	Label density (/100Kb)	FP rate(%)	FN rate(%)	Stretch ratio(%)	Molecule N50(Kb)	Maping rate (%)*
E.coli PL	6369	1.4	10.9	7.01	12	1.023	246.4	90.4
Simulated E.coli PL	6450	1.4	11	7.2	12.7	1.023	244.1	90.3
P.putida	64073	10.7	11.5	2.2	14	0.979	169.5	80.1
Simulated P.putida	65466	10.6	11.7	2.3	13.9	0.981	164.6	80.7
S.prombe	161696	27.3	11.4	4.02	15.9	1.011	172.1	72.4
Simulated S.prombe	158814	27.4	11.5	4.25	16.2	1.011	177.2	74.6
O.sativa**	55029	7.5	10.2	5.13	12.4	0.944	132	67.5
Simulated O.sativa	54695	7.5	10.6	4.4	10.6	0.943	133.9	64.1
*Mapping Rate (%): percentage of molecules mapped to reference genome.
**We simulate a subset from our original O. sativa datasets in Supplementary Table S1.
