# Supplementary material for: Modelling BioNano optical data and simulation study of genome map assembly
Source: Oxford University Press journal article supplement (doi:10.1093/bioinformatics/bty456), 2018-06-07
Supplement: bioinformatics_34_23_3966_s5.xlsx [file bioinformatics_34_23_3966_s5.xlsx]

## Sheet: Supplementary Table S4
Supplementary Table S4. Nick and label density of eight organisms simulatively nicked with different nicking enzymes.
Organism	Enzyme name	Nick Density (Nicks/100 Kb)*	Label Density (Labels/100 Kb)*
D. discoideum	NbBbvCI	0.9903	0.931353
(GC%= 23)	NbBsml	15.5501	11.9543
	NbBsrDl	23.8497	16.8822
	NtBspQl	2.62901	2.26354
S. ratti	NbBbvCI	1.83234	1.7249
(GC%= 22)	NbBsml	14.8915	11.5789
	NbBsrDl	18.395	13.9245
	Nt.BspQl	3.63483	3.26478
A. thaliana chr04	NbBbvCI	7.12516	6.05424
(GC%= 37)	NbBsml	32.4776	21.0418
	NbBsrD1	45.2211	25.8153
	NtBspQ1	14.9284	11.495
H. sapiens chr21	NbBbvCI	41.9645	23.0589
(GC%= 41)	NbBsml	76.1064	27.7785
	NbBsrD1	48.8044	27.3494
	NtBspQ1	12.3252	10.0677
D. melanogaster	NbBbvCI	8.90977	7.71471
(GC%=43)	NbBsml	59.1617	30.4378
	NbBsrDl	62.6108	31.6967
	NtBspQl	13.724	11.1936
O. sitiva	NbBbvCI	9.74976	7.90752
(GC%= 44)	NbBsml	34.5934	21.6006
	NbBsrD1	53.5959	28.468
	NtBspQ1	13.8064	11.2198
P. putida	NbBbvCI	16.1125	12.8153
(GC%= 63)	NbBsml	44.7642	26.1504
	NbBsrD1	82.2194	36.1557
	NtBspQ1	18.0454	13.1889
S. coelicolor	NbBbvCI	12.4603	10.4528
(GC%=73)	NbBsml	9.12604	7.33775
	NbBsrD1	5.58407	4.93798
	NtBspQ1	19.8788	14.8255
*The nick and label density were estimated by Knicker software (http://www.bnxinstall.com/knickers/ Knickers.html)
