# Supplementary material for: Modelling BioNano optical data and simulation study of genome map assembly
Source: Oxford University Press journal article supplement (doi:10.1093/bioinformatics/bty456), 2018-06-07
Supplement: bioinformatics_34_23_3966_s6.xlsx [file bioinformatics_34_23_3966_s6.xlsx]

## Sheet: Supplementary Table S5
Supplementary Table S5. SNR threshold for each scan of the eight data sets.
ScanNumber	O.sitiva	D. melanogaster	S.pombe	S. coelicolor	P. putida	E.coli PL	E.coli A9	E.coli A7
1	3.56546	4.10164	2.95463	3.03558	2.72241	3.53067	4.62721	4.23954
2	3.70013	3.89467	2.90715	3.18513	2.71852	3.589	4.58003	4.04894
3	3.51162	4.01965	2.82376	3.09514	2.72047	3.35784	4.33544	4.32442
4	3.65214	3.93545	2.85141	3.11877	2.71852	3.50403
5	3.6135	3.89378	2.79344			3.61871
6	3.4928	4.03135	2.72248			3.54579
7	3.4914	3.93162	2.73131			3.63863
8	3.53316	3.88741	2.77234
9	3.41366	3.93634	2.72291
10	3.52166	3.82318	2.74173
11	3.26684	3.86159	2.77147
12	3.29047	4.11394	2.74437
13	3.28645	4.05783
14	3.20887	4.05075
15	3.19306	4.07349
16	3.22265	4.1972
17	3.22753	4.04401
18	3.18691	4.03566
19	3.25202	4.0434
20	3.17066	3.99582
21	3.17463	3.99966
22	3.18418	4.2201
23	3.2123	3.83423
24	3.18973	3.85335
25	3.25626	4.60241
26	3.22291	4.22305
27	3.21648	4.16324
28	3.21411	4.00597
29	3.23097	4.06872
30	3.26125	4.08847
31	3.25456	3.92828
32	3.15813	3.93381
33	3.25154	3.88583
34	3.23798
35	3.95906
36	3.88692
37	3.84053
38	4.00422
39	4.16149
40	4.20947
41	4.16215
42	3.98014
43	3.94324
44	3.8952
45	3.87928
46	3.94975
47	3.85903
48	3.9378
49	3.97411
50	3.9302
51	4.03522
52	4.02311
53	4.13866
54	4.20629
55	4.00761
56	3.81365
57	3.93802
58	3.93297
59	3.93799
60	3.85229
61	3.6803
62	3.95808
63	3.89068
64	3.88459
65	3.78449
66	3.8089
67	3.97328
68	3.77404
69	3.73035
70	3.55167
71	3.68367
72	3.77688
73	3.83028
74	3.86911
75	3.72236
76	3.91218
77	3.87361
78	3.54517
79	3.8737
80	3.78174
81	3.70936
82	4.46451
83	4.41301
84	4.73164
85	4.69632
86	4.65943
87	4.40164
88	4.35464
89	4.36191
90	4.4161
91	4.43036
92	4.40091
93	4.16333
94	4.25412
95	4.35434
96	4.18144
97	4.06126
98	4.06075
99	4.09327
100	3.87626
101	4.34851
102	3.87559
103	4.01513
104	3.97959
105	3.94778
106	4.03478
107	4.36843
108	4.06429
109	3.8589
110	3.6386
111	3.38134
112	3.89986
113	3.91753
114	3.99508
115	3.95098
116	3.771
117	3.70065
118	3.85903
119	3.84696
120	3.82436
121	4.55989
122	4.1669
123	4.07746
124	4.19691
125	4.04078
126	4.04415
127	4.0055
128	4.03296
129	4.03366
130	3.91207
131	4.02523
132	4.00591
133	3.95372
