# Supplementary material for: Modelling BioNano optical data and simulation study of genome map assembly
Source: Oxford University Press journal article supplement (doi:10.1093/bioinformatics/bty456), 2018-06-07
Supplement: bioinformatics_34_23_3966_s7.xlsx [file bioinformatics_34_23_3966_s7.xlsx]

## Sheet: Supplementary Table S6
Supplementary Table S6. Summaries of the properties of BioNano data and the observation of these properties.
Properties	Attributes/description	Observation
Molecule length	distribution of the BioNano molecule length	Fit an exponential distribution
Label errors	false positive label rate	1) vary from 2.2% to 9.04%, with an average of 5.2%; 2) false positive signals are random events with a physically uniform distribution along DNA molecules
	false negative label rate	1) vary from 5.25% to 15.9%, with an average of 12.2% ; 2) false negativ signals are elevated in the middle intervals of DNA molecules
DNA stretching bias	stretch variation factor R*	Varies between different nanochips, runs, and scans and is likely affected by factors such as nano-channel size, labelling reagent, and salt concentration.
Optical resolution	neighbouring sites distance	1) With the low boundary approaching ~1 Kb, whereas neighboring sites within 1 Kb of each other may be detected but un-reliable; 2) The likelihood of two neighbouring sites within 1 to 3 Kb being resolved follows a cumulative Gaussian distribution.
Chimeric molecules	rate and types	1) On average, account for ~15% of total molecules and have a substantially higher frequency for longer DNA molecules (>300 Kb); 2) ‘Bimera’ was the most common type, accounting for ~87% of all chimeric instances. Higher-order chimeras, such as ‘Trimeras’ and ‘Quadrameras’ and "multi-molecule pileup", occurred at a much lower frequency.
coverage depth	coverage distributions	Deviated from homogeneous Poisson
Fragile site	likelihood of breakage	1) The likelihood of breakage increased as the two nicking sites on opposite strands getting closer to each other, following a curve approximating exponential decay; 2) a fragile site was likely to form when two nicking sites on opposite strands were within 400 bp of each other
*See the defination in Method section 2.4
