# Supplementary material for: Modelling BioNano optical data and simulation study of genome map assembly
Source: Oxford University Press journal article supplement (doi:10.1093/bioinformatics/bty456), 2018-06-07
Supplement: bioinformatics_34_23_3966_s8.xlsx [file bioinformatics_34_23_3966_s8.xlsx]

## Sheet: Supplementary Table S7
Supplementary Table S7 Nick and label density of 128 organisms simulatively nicked with different nicking enzymes
Organism	Genome size (Mb)	GC%	Enzyme name
			NbBbvCI		NtBspQl		NbBsml		NbBsrDl
			Nick Density (Nicks/100 Kb)*	Label Density (Labels/100 Kb)*	Nick Density (Nicks/100 Kb)*	Label Density (Labels/100 Kb)*	Nick Density (Nicks/100 Kb)*	Label Density (Labels/100 Kb)*	Nick Density (Nicks/100 Kb)*	Label Density (Labels/100 Kb)*
P. gallinaceum	25.03	16.9	0.293167	0.293167	2.72226	2.50448	17.2005	13.3642	14.0343	11.2199
P. relictum	22.61	18.3625	0.349873	0.341015	3.13557	2.9097	17.7549	13.7159	17.1703	13.2553
P.reichenowi	20.5	19.6279	0.635329	0.630246	3.15631	2.95301	13.0064	10.704	8.60998	7.6087
P.gaboni	20.38	21.2292	0.656098	0.651089	3.03508	2.84476	12.7012	10.4124	10.0117	8.46917
P.falciparum	23	21.8	0.859499	0.833714	3.45948	3.19304	13.3179	10.6578	9.16226	7.76558
S.ratti	16.6	22	1.83234	1.7249	3.63483	3.26478	14.8915	11.5789	18.395	13.9245
S. stercoralis	42.28	22.1	2.03933	1.85181	4.47012	3.79269	17.2593	13.2463	18.429	14.0995
P. berghei	18.56	22.1078	0.705193	0.640098	3.1137	2.95639	26.3796	18.7853	25.8101	18.1397
P. yoelii	22.76	22.6913	0.593608	0.562599	2.93703	2.74655	21.1262	15.3541	22.0034	15.8325
D.discoideum	8.4	23	0.9903	0.931353	2.62901	2.26354	15.5501	11.9543	23.8497	16.8822
P. vinckei	18.22	23.45	0.901576	0.862377	3.6623	3.35431	25.2665	17.8635	25.3897	17.9307
P. chabaudi	18.87	23.6597	1.21903	1.15543	4.04929	3.59878	30.7937	20.9885	27.8044	19.4727
D. purpureum	32.97	24.5	2.49605	2.03641	7.07416	6.03617	20.4676	14.3918	27.9161	19.1587
P. malariae	33.62	24.7	1.26718	1.18984	6.34481	5.46135	26.8219	18.5882	25.3852	17.0176
P. brasilianum	30.09	24.8893	1.38166	1.32173	6.92162	5.94946	27.4468	18.9937	26.1483	17.5188
S. venezuelensis	52.18	25.1	2.32267	2.14813	4.2675	3.87815	22.9524	16.5214	24.623	17.3711
S. papillosus	60.23	25.6	2.37654	2.22086	4.17178	3.77762	23.5666	16.9488	25.3519	18.012
H. tvaerminnensis	13.27	26.5	1.28854	1.26594	5.48572	5.33502	28.574	25.5674	25.9743	23.4349
P. gonderi	33.01	26.9	2.41097	2.07957	6.06846	5.3023	33.939	21.9754	33.3188	21.4099
D. intermedium	31.24	27.2	1.49879	1.40009	3.52764	3.27906	20.3104	15.3388	31.4015	21.1183
D. firmibasis	30.32	27.8	1.78848	1.62589	3.70552	3.31606	18.8377	14.3986	28.0599	19.3746
P. ovale	33.2	28.7513	2.4287	2.15818	8.36519	6.84725	35.7121	22.5977	38.2881	23.0606
C.beijerinckii	6.1	29.6	3.28299	3.06634	10.4322	8.68242	30.2635	20.9145	42.0622	25.214
D. citrinum	26.14	30.3	1.67867	1.59032	3.95127	3.63713	22.2793	16.6837	32.7293	22.2105
P. violaceum	25.72	31.8	3.04393	2.85733	6.91591	5.96347	26.1164	18.1548	44.4967	25.9259
C.sativus	191.6	32.48	4.29301	3.8832	9.43349	7.95713	32.438	20.8919	40.7608	24.1519
D. magna	129.54	33.3	6.0115	5.4722	14.398	11.8957	47.398	29.2617	51.4701	30.8033
G. hirsutum	2189.14	33.6	5.11448	4.32589	7.41873	6.39766	35.8447	22.3793	43.1882	24.5513
P. patens	467.9	33.73	6.39393	5.73392	13.0317	10.3268	42.4003	25.0185	54.4222	28.8426
P. trichocarpa	429.3	33.75	5.44801	4.71812	10.0103	8.27345	35.836	21.8055	47.1909	26.1278
S. lycopersicum	816.1	34.05	4.81145	3.98259	7.77416	6.75807	30.997	20.5307	38.6601	23.0626
H. robusta	235.37	34.2	3.54073	3.1875	6.09834	5.48841	38.8557	23.9413	44.4838	25.9757
M. esculenta	575.18	34.5	8.55922	7.09018	12.0203	9.85151	41.1533	24.9462	45.5445	26.4639
H. elegans	1026.04	34.6	4.70184	4.2272	8.54687	7.17323	40.724	25.4827	53.8163	29.9349
G.max	968.1	34.76	6.43607	5.46978	8.95436	7.66702	37.6739	22.7318	48.184	26.3324
C. virginica	684.74	34.8191	4.34586	3.81495	6.26268	5.50816	39.088	23.7429	50.5703	27.4873
G.biloba	10466.1	35.1	3.58052	3.28669	9.64065	8.10154	41.3909	25.9543	44.8835	27.1664
T. castaneum	165.94	35.1887	3.82013	3.50982	6.70015	5.80072	30.5892	20.147	35.6336	22.3146
B.rapa	286.3	35.26	7.53591	6.4306	13.5943	10.6974	29.4731	19.8521	37.7707	23.3679
C. gigas	557.74	35.3	4.68662	4.17835	6.17909	5.54436	37.2632	23.5612	50.6564	28.3525
C. elegans	100.28	35.6158	3.62362	3.20781	14.7946	11.3535	40.4352	23.9035	40.853	24.1428
L. ggantea	359.51	36	3.18707	2.80901	5.45309	4.77358	28.9633	19.444	41.1325	24.2443
C. intestinalis	115.22	36.0619	4.06107	3.72851	6.38983	5.52858	36.9651	23.112	50.7433	28.3267
A.lyrata	204.7	36.09	6.86643	5.91964	14.1714	10.9975	31.8819	20.6738	41.4418	24.4202
B. vulgaris	517.42	36.45	5.92538	5.07388	10.4282	8.70276	31.8392	21.0825	43.0945	25.812
D.rerio	1660.5	36.7687	8.57743	7.31026	11.9717	9.74178	40.4906	24.2217	46.7563	26.3529
P. martensii	990.98	36.8305	4.58484	3.68955	4.76458	4.19434	38.7429	23.755	40.9131	24.3271
A. thaliana	121.2	37	7.12516	6.05424	14.9284	11.495	32.4776	21.0418	45.2211	25.8153
L. anatina	425.49	37	7.04153	6.16802	8.1697	7.05526	45.6192	26.3539	53.8142	29.4085
C. quinoa	1333.55	37	9.55516	6.45355	10.864	9.06057	60.8902	24.5679	44.4673	25.0092
E. tribuloides	2225.7	37.2	5.15766	4.58068	6.37445	5.61887	39.7625	25.7045	49.0991	29.7749
C. savignyi	587.353	37.5	3.93205	3.64285	5.76495	5.18297	32.9614	21.4865	64.3972	32.286
I. nil	735.231	37.6024	6.60717	5.32299	10.2359	8.21747	36.3065	22.2572	44.1997	25.2324
M. domestica	3558.5	38.1446	13.7131	11.0166	14.9517	11.8833	40.6806	25.2756	51.8474	28.7066
A. guillouiae	4.85	38.2	7.2383	6.55971	7.2383	6.08676	39.42	24.1003	87.1064	37.0757
M. bicolor	82.38	38.6	11.5586	8.97312	17.7469	12.8714	39.1489	21.4045	43.6987	21.7557
A. calcoaceticus	4.12	38.69	6.59356	6.17994	10.7784	9.29424	42.3593	25.2064	76.5436	35.2792
A. pittii	3.99	38.8	7.24913	6.44655	11.7022	9.88989	41.1906	24.9318	73.3716	34.3039
H. annuus	3027.84	38.9115	8.23321	6.8655	8.70927	7.37603	39.1485	23.6606	39.3237	23.1803
N.tabacum	3625.7	38.95	8.18559	7.01425	10.3314	8.65568	38.1975	23.8782	37.65	23.0923
A. baumannii	4.34	39	7.26511	6.31949	12.3161	10.3787	39.7159	24.4938	74.081	33.95
P. tunicata	4.99	39.9006	8.26907	7.50638	12.3434	10.1758	30.5273	20.8533	83.7544	35.8661
O. niloticus	998.8	39.9248	16.1868	12.3234	14.3672	11.5681	38.1411	23.4935	42.5115	25.0972
O. dioica	70.47	40.25	7.04162	6.09773	23.7131	17.0577	48.9186	27.5067	36.9366	23.2982
L. oculatus	935.5	40.4083	13.0277	10.4923	15.6432	12.3433	46.3672	27.2033	56.8704	30.4395
A. digitifera	447.49	40.4999	7.48798	6.59103	12.6292	10.4132	46.1594	27.3315	59.8358	31.7368
M. acuminata	472.23	40.729	8.05911	6.81755	14.6605	11.7871	42.1594	25.4237	51.0173	28.3955
A. carolinensis	1779.6	40.8238	12.1465	9.77298	16.9268	13.3614	50.4457	28.1719	61.6381	31.2134
G. gorilla	2917.34	40.9804	33.7441	20.2528	11.4156	9.41474	49.5894	26.7069	55.8662	28.8259
H. sapiens	2787.3	41	41.9645	23.0589	12.3252	10.0677	76.1064	27.7785	48.8044	27.3494
C. lupus	2384.3	41.1	17.5204	12.9403	14.0944	11.3152	38.9338	24.289	38.7998	23.9298
M. polymorpha	203.8	41.11	8.73724	7.36519	17.5155	13.4242	49.4053	28.2687	54.4438	30.0039
M. musculus	3235.7	41.2015	45.1442	24.1967	12.4385	10.199	38.8996	23.9548	45.4744	26.6541
B. belcheri	421.68	41.3	9.35579	7.66271	8.93377	7.55406	37.9286	23.2896	50.6313	27.6646
C. anna	1105.67	41.35	26.7305	17.9632	20.4651	15.5506	43.3923	26.3495	57.284	31.1029
L. crocea	678.92	41.4001	17.6187	13.4272	13.6554	11.0663	36.8364	23.1627	42.3635	25.0534
C. teleta	333.28	41.8	12.0799	9.86812	12.257	10.0644	67.0451	33.7286	75.1182	36.0213
N. vectensis	356.61	41.9	7.58864	6.26043	10.7643	8.55639	42.025	24.8154	49.9657	26.6635
G. gallus	1220.7	42.2219	24.3916	16.3679	20.9098	15.1906	50.0686	27.7019	60.3267	30.0055
D. pulex	197.21	42.4	6.37549	5.68511	13.4918	10.8803	40.8789	25.2592	44.6726	26.4698
L. chalumnae	2831.5	42.55	13.6259	11.1588	12.4788	10.336	42.2505	25.9119	57.2003	31.07
C. milii	966.7	42.5998	13.978	11.1938	11.9588	10.0236	48.0945	27.7687	73.0291	34.6706
C. hircus	2922.78	42.6914	12.5715	9.92673	15.3339	12.3778	42.9216	25.5026	51.3319	29.2408
D. melanogaster	136.2	43	8.90977	7.71471	13.724	11.1936	59.1617	30.4378	62.6108	31.6967
M. daphniae	5.64	43	7.55727	6.63478	26.9826	19.0528	60.3872	32.5175	82.6332	37.467
O.sativa Indica 9311	382.5	43.5	9.20502	7.59354	12.9591	10.5129	33.2128	20.9613	52.3267	28.2498
O. sitiva Japonica Nipponbare	370.5	44	9.74976	7.90752	13.8064	11.2198	34.5934	21.6006	53.5959	28.468
O. cuniculus	2707.1	44.0526	16.3387	11.9652	13.8604	11.3439	41.0749	25.2338	48.4352	27.7422
S. bicolor	709.34	44.1611	13.1375	10.2324	15.4618	11.9878	36.1781	22.4454	52.2918	28.1173
G. aculeatus	442.9	44.6	18.7506	14.3606	15.3234	12.2523	42.3391	25.6198	44.8742	26.1825
S.moellendorffii	210.7	45.25	11.7318	9.71059	27.0282	17.912	55.9511	29.3967	67.5263	32.4017
O. thomaeum	243.17	45.3	12.0975	9.87809	14.8182	11.8623	40.4726	23.8224	56.5265	29.4455
L.brevis	2.3	45.6	9.34	7.85608	6.32851	5.58654	35.3087	22.7826	68.086	33.9557
M. lignano	764.41	45.9	20.4238	11.1954	12.1621	8.56732	48.4301	23.9019	51.4494	25.1166
E. mitis	60.41	46.5	26.912	17.8802	17.7295	13.1228	44.903	24.2845	41.1279	23.5818
Z.mays	2053.1	46.89	16.981	11.7933	17.8003	13.8077	44.2325	26.108	45.1283	26.9292
P. marinus	86.61	47.4	33.9727	20.4147	20.0591	15.5464	52.7627	30.8174	47.8258	28.8219
E.coli	4.6	50.6	5.43142	5.04346	14.7209	11.5094	57.2238	30.8427	85.1784	37.1147
E. necatrix	55.01	51	28.4892	18.6025	24.5612	17.5062	56.1517	28.2052	53.7625	27.5842
E. tenella	51.89	51.0796	30.3388	19.8698	24.9178	17.8741	55.8034	28.1595	52.5403	27.0191
T. gondii	65.67	52.2873	18.0661	13.9265	35.8604	22.0958	62.0408	31.8261	35.0187	21.8468
C.glutamicum	3.3	54.0986	21.0612	15.3804	19.913	14.7761	54.6625	29.9752	71.584	33.4804
G. lucidum	43.12	55.5	20.5816	15.3104	25.5745	18.0747	54.2009	29.503	53.5887	29.1876
B. indica	4.42	57.0207	12.5152	10.2521	20.821	15.6836	59.7472	30.8015	86.475	37.5231
P. savastanoi	6.02	57.9	13.1963	11.1853	19.0632	14.4262	61.0787	31.9105	92.4574	38.1763
P. amygdali	6.14	58.1	11.8817	9.96799	18.5049	13.9785	63.3691	32.3668	90.7437	37.925
P. syringae	6.09	58.7	12.7181	10.7816	17.9694	13.7519	61.5554	31.6721	83.3648	36.2834
P. fluorescens	6.85	60.3	13.7456	11.4376	13.7894	11.1016	46.0572	27.3013	74.0158	34.4881
O.lucimarinus	13.1	60.44	7.99704	6.90653	30.0571	20.038	40.4471	24.3243	18.1524	12.8286
P. fuscovaginae	6.54	61.4	13.3945	11.0281	13.7889	11.1191	42.2617	25.8182	63.9994	31.8252
P. chlororaphis	6.83	62.8	15.9502	12.5524	17.3543	13.2403	43.5962	25.7646	58.718	30.4121
P. putida	6.1	63	16.1125	12.8153	18.0454	13.1889	44.7642	26.1504	82.2194	36.1557
P. stutzeri	4.55	63.3	15.3476	12.1814	20.0751	15.0178	49.7369	28.5844	55.6297	29.4859
P. mendocina	5.19	63.4	15.9084	12.6557	18.7667	13.8976	44.1767	26.0211	46.0297	26.2971
C.reinhardtii	109.8	64.08	30.7331	20.0101	11.6982	9.82244	43.9408	25.1581	62.971	31.2104
M. tuberculosis	4.41	65.6	14.4394	11.5833	9.38449	8.1831	39.2154	24.2093	49.9373	27.7908
A. vinelandii	5.36	65.7	10.7522	9.1123	18.9327	14.1436	39.2258	23.8336	35.5548	21.6534
A. beijerinckii	4.94	65.7	13.573	11.0002	21.028	15.8824	36.6674	23.1146	34.5605	21.3724
A. chroococcum	5.11	65.9064	13.9823	11.4015	19.9719	15.3497	39.1735	23.9586	39.7898	23.169
M.pusilla	21.7	65.93	15.398	12.1638	32.0841	20.937	17.0358	12.6377	6.9974	5.2768
P. aeruginosa	6.6	66.2	17.4478	13.2016	21.1672	15.644	34.704	22.3485	33.7622	22.1889
S. filamentosus	7.85	70.95	14.3263	11.5122	23.4977	16.8718	11.8832	9.38885	6.83058	5.9224
S. rimosus	9.59	71.9	13.3578	10.8656	21.6165	15.9125	14.7238	11.095	9.73939	8.13354
S. hygroscopicus	12.01	71.9745	16.2751	12.7537	25.3908	17.7403	17.657	13.2365	13.2032	10.6225
S. albulus	9.37	72.2986	13.7958	11.1284	23.0251	17.0927	13.2197	10.1148	8.32231	7.02061
S. viridosporus	8.09	72.3	13.443	11.1819	17.1498	13.0847	9.41506	7.67291	5.73306	5.00407
S. griseus	8.54	72.6	14.6737	11.7483	5.59331	5.01993	10.6249	8.53038	5.74543	4.86782
S. coelicolor	8.7	73	12.4603	10.4528	19.8788	14.8255	9.12604	7.33775	5.58407	4.93798
*The nick and label density were estimated by Knicker softer (http://www.bnxinstall.com/knickers/ Knickers.htm)
